# Supplementary material for: Chitinase Expression in Listeria monocytogenes Is Positively Regulated by the Agr System
Source: PubMed Central journal article supplement (PMC3994053; doi:10.1371/journal.pone.0095385), 2014-04-21

**A**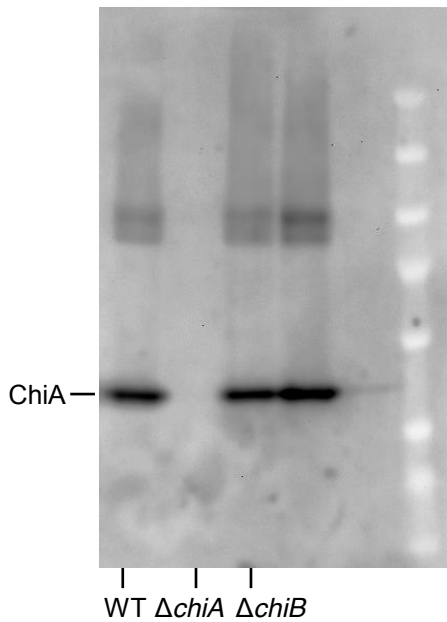**B**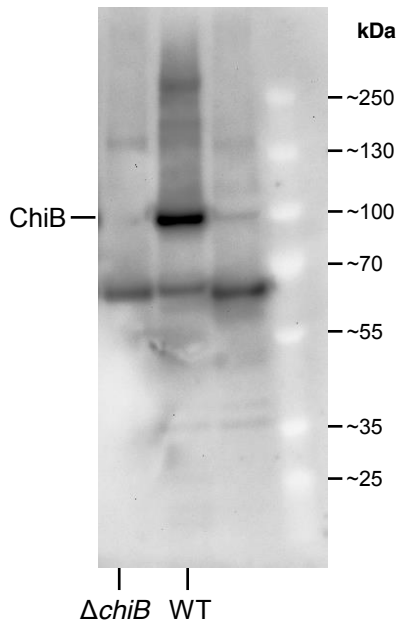

Supplement: pone.0095385.s001.pdf [file pone.0095385.s001.pdf]
